# Supplementary material
Source: HighWire-hosted journal article supplement (https://jnm.snmjournals.org/highwire/filestream/95539/field_highwire_adjunct_files/0/224568_Supplemental_Data.pdf)
Supplement: 224568_Supplemental_Data.pdf [file 224568_Supplemental_Data.pdf]

**Supplemental Table 1 Predicted and observed transfer constants**

|        | Literature values            |                                     |                                         |                                     |                                                                |                                        | Predicted transfer constants |         | Observed transfer constants |                  |
|--------|------------------------------|-------------------------------------|-----------------------------------------|-------------------------------------|----------------------------------------------------------------|----------------------------------------|------------------------------|---------|-----------------------------|------------------|
|        | ABC<br>(2-fold error)<br>(9) | total tissue<br>volume (mL)<br>(22) | tissue<br>plasma<br>volume (mL)<br>(22) | plasma volume<br>fraction *<br>(11) | Fraction of whole<br>body catabolic<br>rate per tissue<br>(11) | No target<br>expression<br>for<br>(20) | $V_t$ †                      | $K_i$ ‡ | Baseline $V_t$ §            | Baseline $K_i$ § |
| kidney | 0.137<br>(0.07-0.27)         | 332                                 | 18.2                                    | 0.055                               | 0.06                                                           | CD20<br>EGFR<br>HER2                   | 0.19                         | 1.41    | 0.20<br>(0.16-0.25)         | 0.7<br>(0.4-1.3) |
| liver  | 0.121<br>(0.06-0.24)         | 2143                                | 183                                     | 0.085                               | 0.30                                                           | CD20                                   | 0.21                         | 1.13    | 0.24<br>(0.21-0.28)         | 1.1<br>(0.8-2.1) |
| lung   | 0.149   <br>(0.07-0.30)      | 1000                                | 55                                      | 0.055                               | 0.013                                                          | CD20<br>EGFR<br>PSMA                   | 0.10                         | 0.10    | 0.09<br>(0.07-0.10)         | 0.2<br>(0.1-0.3) |
| spleen | 0.128<br>(0.06-0.26)         | 221                                 | 26.8                                    | 0.121                               | 0.028                                                          | EGFR<br>HER2                           | 0.25                         | 0.99    | 0.24<br>(0.20-0.27)         | 0.5<br>(0.3-0.7) |

Observed values for  $V_t$  ( $\text{mL}\cdot\text{cm}^{-3}$ ) and  $K_i$  ( $\mu\text{L}\cdot\text{g}^{-1}\cdot\text{h}^{-1}$ ) presented as median (interquartile range)

\* Plasma volume divided by total tissue volume.

† ABC plus plasma volume fraction.

‡ Fraction of whole body catabolic rate per tissue multiplied by the estimated whole body catabolic rate of  $7.8 \text{ mL}\cdot\text{h}^{-1}$ , divided by the tissue plasma volume, multiplied by 1000.

§ To determine baseline values per tissue, data from  $^{89}\text{Zr}$ -labeled mAbs, for which no target expression was reported, were used.

|| The ABC for lung was reported as 0.149 based on quantified tissue biodistribution per gram. To correct for the density of the lung in the calculation of predicted  $V_t$  (per ml), the ABC was multiplied by 0.3 g/mL.

**Supplemental Table 2 Relative difference between fitted and measured tissue activity concentrations**

|        | <sup>89</sup> Zr-antiHER2<br>24 h p.i. | <sup>89</sup> Zr-antiHER2<br>48-96 h p.i. | <sup>89</sup> Zr-antiHER2<br>120-192 h p.i. | <sup>89</sup> Zr-antiPSMA<br>24 h p.i. | <sup>89</sup> Zr-antiPSMA<br>48-120 h p.i. | <sup>89</sup> Zr-antiPSMA<br>144-168 h p.i. |
|--------|----------------------------------------|-------------------------------------------|---------------------------------------------|----------------------------------------|--------------------------------------------|---------------------------------------------|
| kidney | -1.1 (11.0)<br>n=10                    | 3.3 (14.3)<br>n=10                        | -1.1 (3.6)<br>n=10                          | 18.2 (14.5)<br>n=9                     | -8.3 (6.6)<br>n=9                          | 2.0 (1.6)<br>n=9                            |
| liver  | 3.5 (5.6)<br>n=10                      | -3.3 (5.4)<br>n=10                        | 0.7 (2.1)<br>n=10                           | 0.5 (11.2)<br>n=8                      | 0.6 (6.2)<br>n=8                           | 0.1 (1.5)<br>n=8                            |
| lung   | -1.7 (6.1)<br>n=10                     | 3.0 (10.9)<br>n=10                        | -0.6 (3.0)<br>n=10                          | 1.1 (5.0)<br>n=6                       | -1.0 (10.4)<br>n=6                         | 0.0 (2.0)<br>n=6                            |
| spleen | 1.4 (4.0)<br>n=10                      | -1.1 (4.9)<br>n=10                        | 0.2 (1.7)<br>n=10                           | 0.4 (8.2)<br>n=8                       | 0.2 (6.6)<br>n=8                           | 0.1 (1.4)<br>n=8                            |

Data presented as mean (SD) in %
